# Supplementary material for: De Novo Genesis of Enhancers in Vertebrates
Source: PubMed Central journal article supplement (PMC3206014; doi:10.1371/journal.pbio.1001188), 2011-11-01
Supplement: pbio.1001188.s003.pdf [file pbio.1001188.s003.pdf]

A

**Medaka *ttc29*RR**

chr1:22,443,321 - 22,443,901 (581 bp) / deleted region : chr1:22,443,497 - 22,443,726 (230 bp)

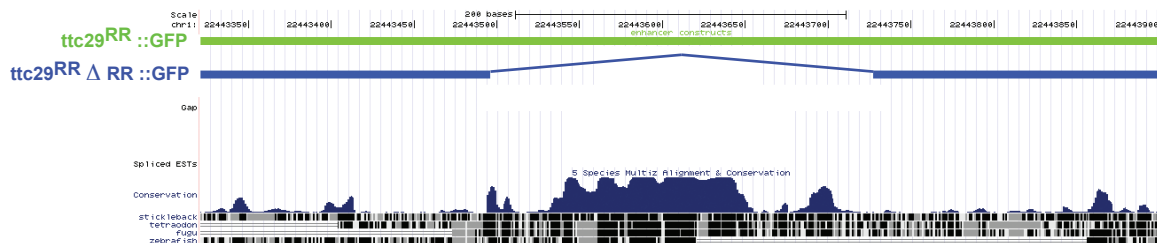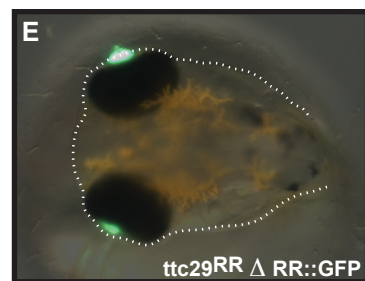

B

**Medaka *dock9*RR**

chr21:9,259,960 - 9,260,528 (569 bp) / deleted region: chr21:9,260,151 - 9,260,338 (188 bp)

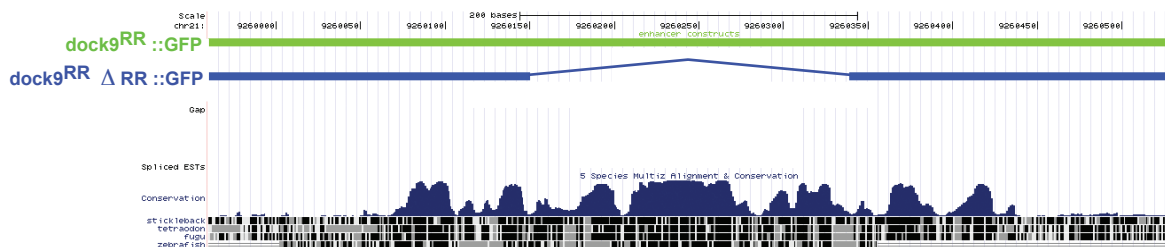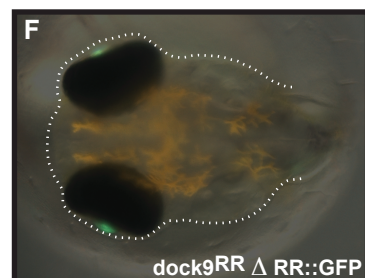

C

**Medaka *ccdc46*RR**

chr1:4,649,989 - 4,650,511 (523 bp) / deleted region: chr1:4,650,131 - 4,650,317 (187 bp)

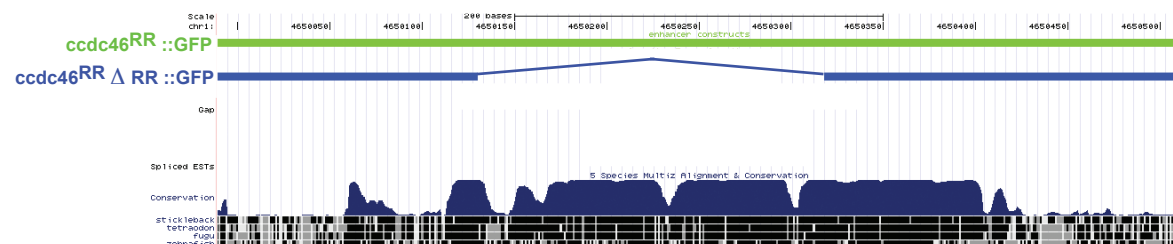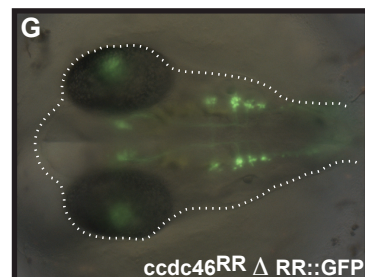

D

**Medaka *fam44b*RR**

chr10:16,717,848 - 16,718,337 (490 bp) / deleted region: chr10:16,717,951 - 16,718,149 (199 bp)

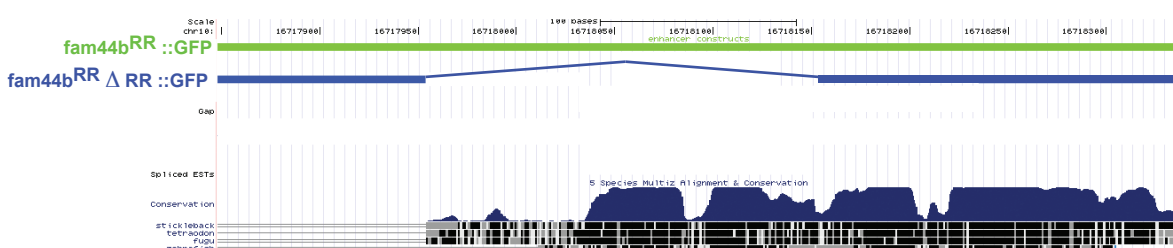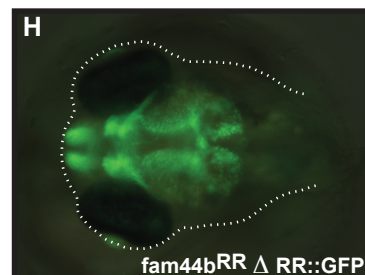

GREEN: RR enhancer construct

BLUE: RR enhancer Δ RR construct

Genome Coordinates: *Oryzias latipes* (HdrR), Oct. 2005 (NIG/UT MEDAKA1/oryLat2)Conservation tracks: UCSC Genome Browser (<http://genome.ucsc.edu/>)
