# Supplementary material for: De Novo Genesis of Enhancers in Vertebrates
Source: PubMed Central journal article supplement (PMC3206014; doi:10.1371/journal.pbio.1001188), 2011-11-01
Supplement: pbio.1001188.s004.pdf [file pbio.1001188.s004.pdf]

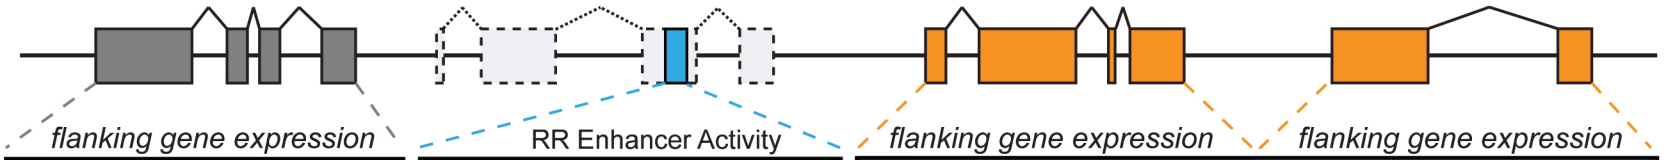

no expression

*ednra* (1 of 2)

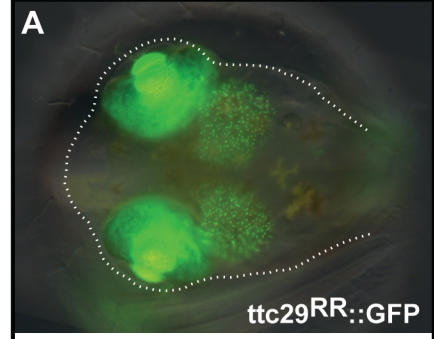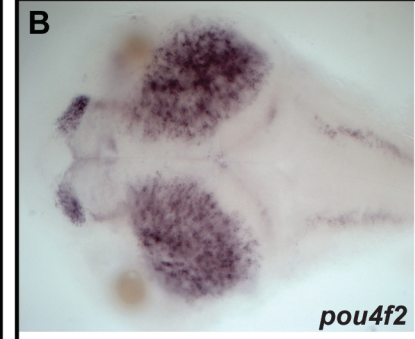

n.d.

no expression

*clybl*

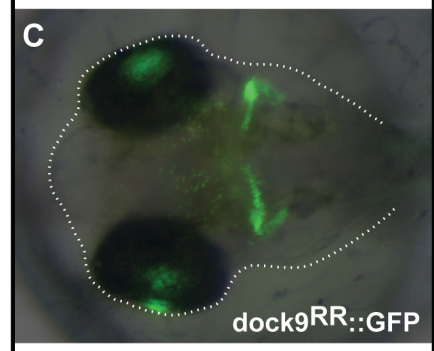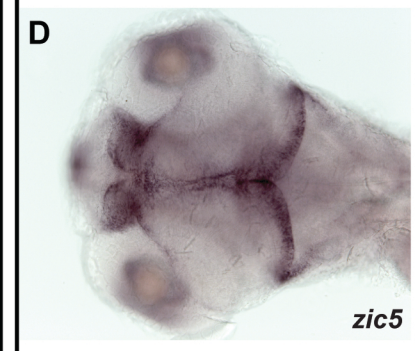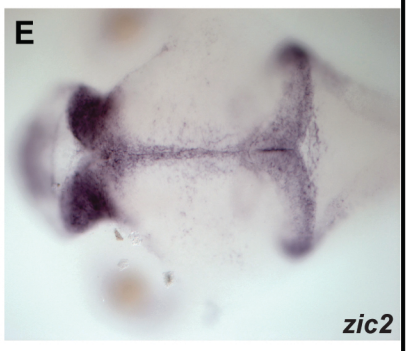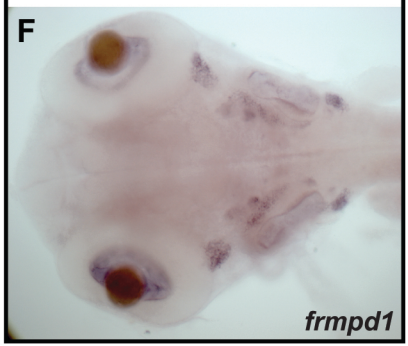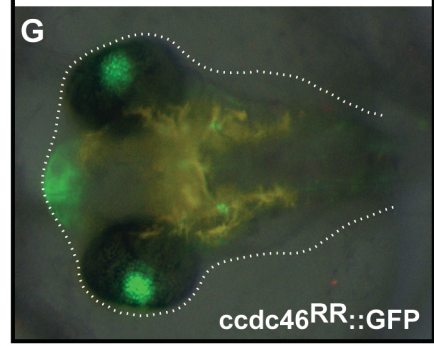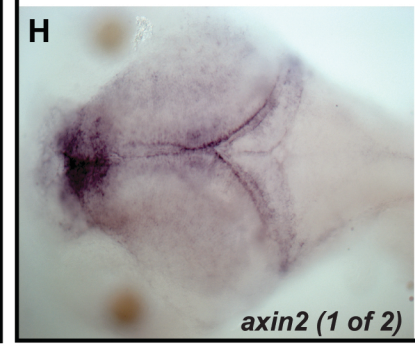

n.d.
