# Supplementary material for: De Novo Genesis of Enhancers in Vertebrates
Source: PubMed Central journal article supplement (PMC3206014; doi:10.1371/journal.pbio.1001188), 2011-11-01

**A**

Number of positions matching family of transcription factor binding sites in various types of sequences

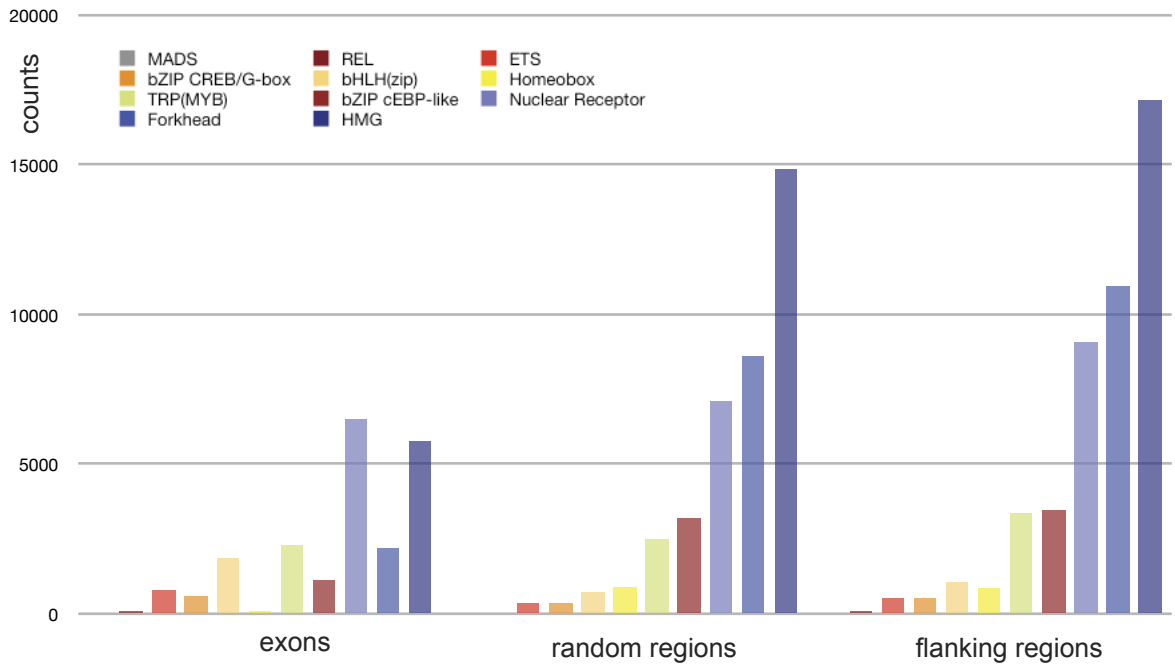

**B**

Distribution of S200 for exonic sequences versus enhancers

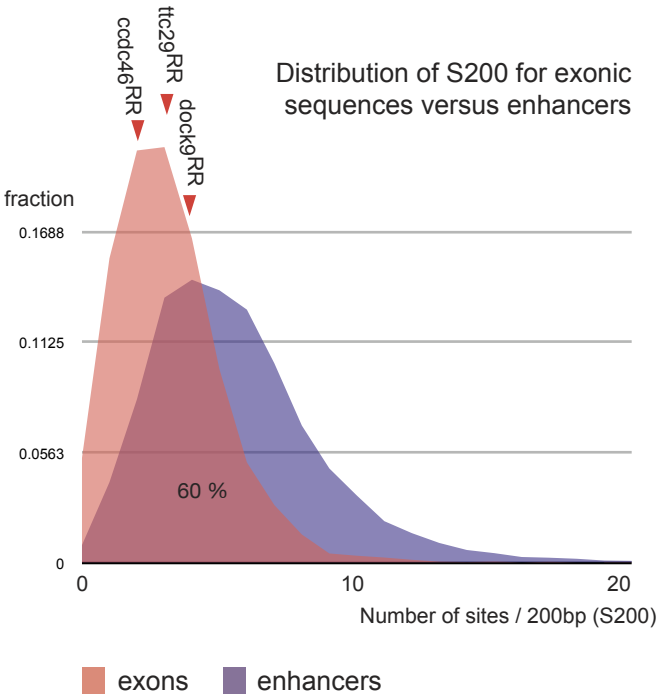

**C**

Distribution of S200 for non-coding sequences versus enhancers

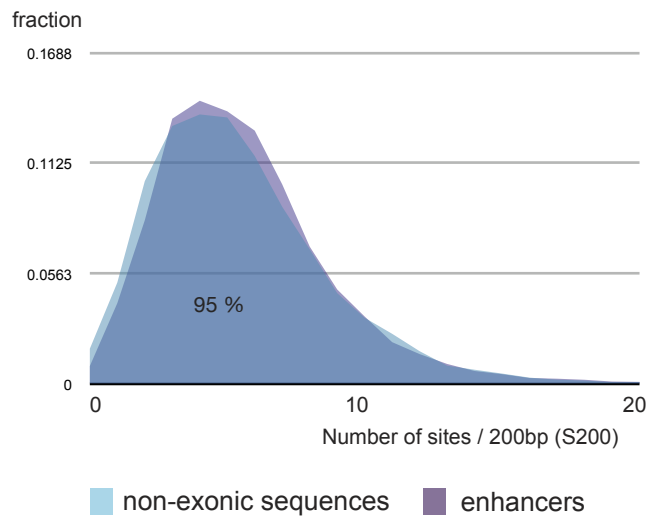

Supplement: pbio.1001188.s007.pdf [file pbio.1001188.s007.pdf]
