# Supplementary material for: De Novo Genesis of Enhancers in Vertebrates
Source: PubMed Central journal article supplement (PMC3206014; doi:10.1371/journal.pbio.1001188), 2011-11-01

Figure S8 Eichenlaub and Ettwiller 2011

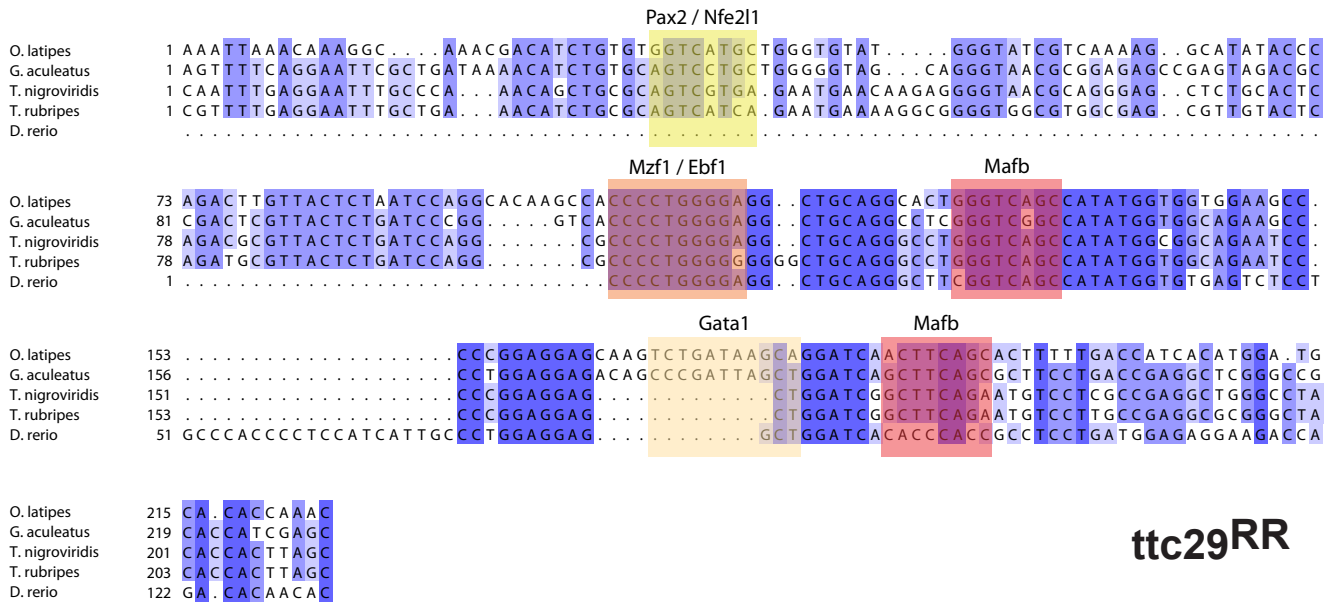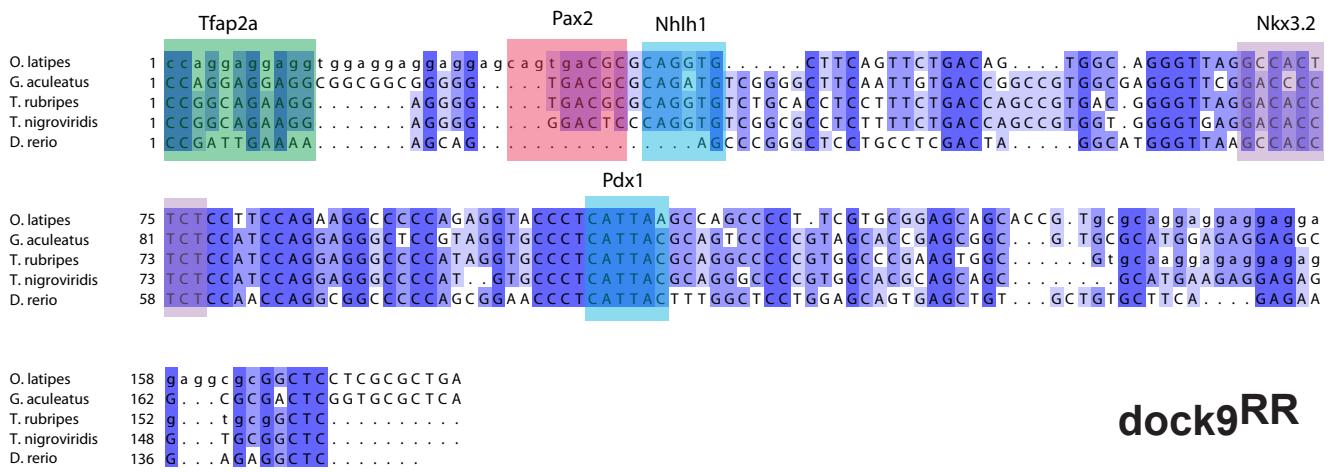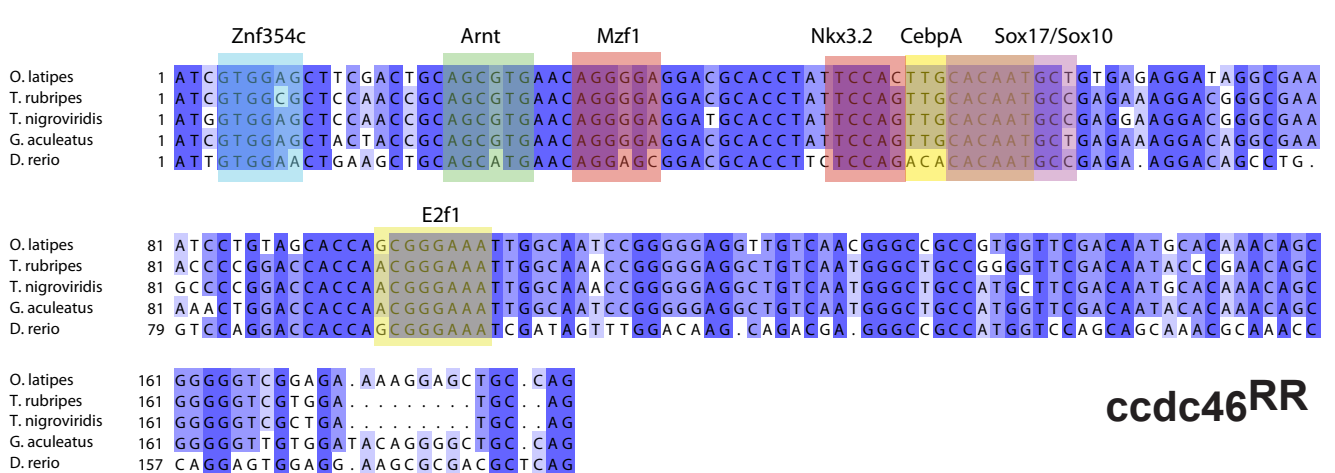

Supplement: pbio.1001188.s008.pdf [file pbio.1001188.s008.pdf]
