# Supplementary material for: De Novo Genesis of Enhancers in Vertebrates
Source: PubMed Central journal article supplement (PMC3206014; doi:10.1371/journal.pbio.1001188), 2011-11-01
Supplement: pbio.1001188.s009.pdf [file pbio.1001188.s009.pdf]

### mouse *Ccdc46* locus

mouse chr11: 108,466,377 - 108,467,909 (1533 bp)

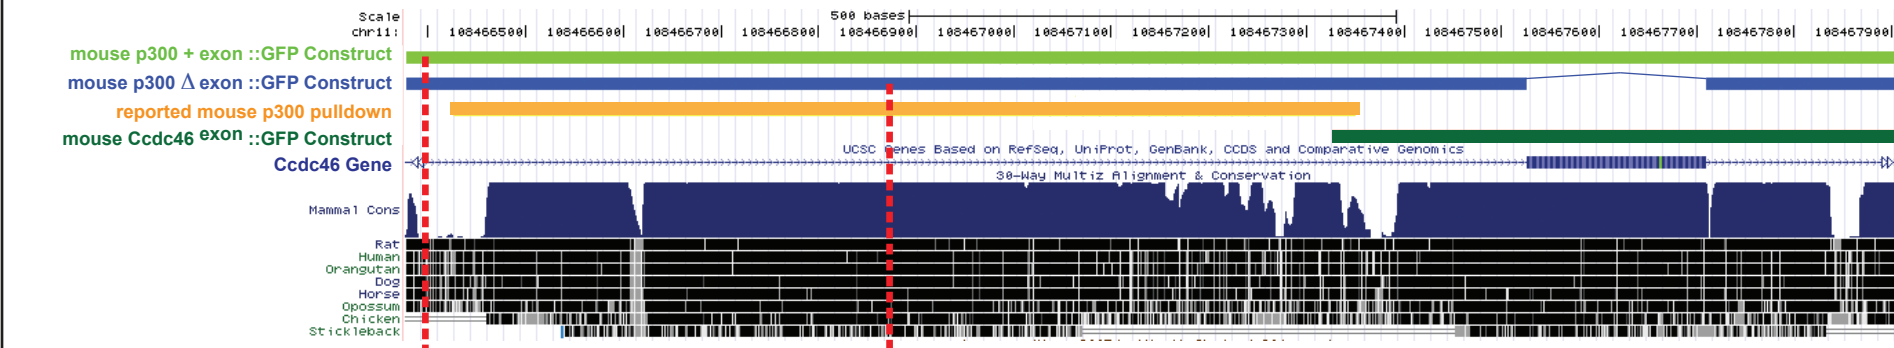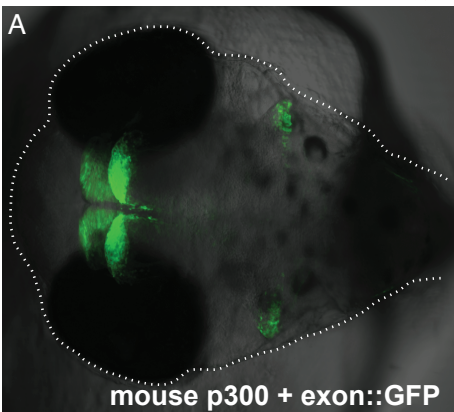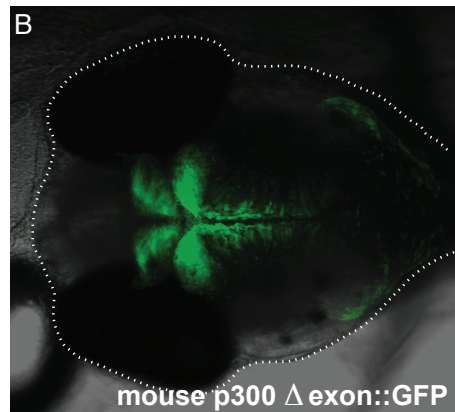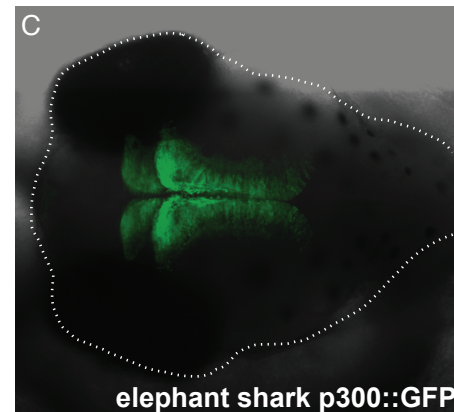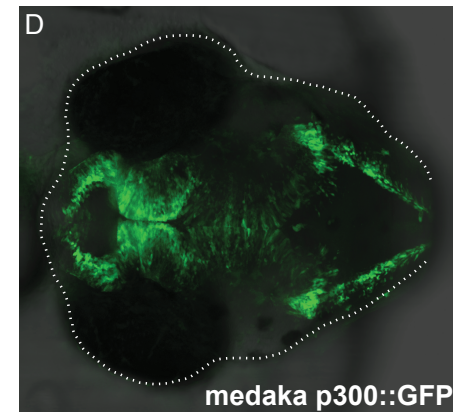

### medaka *ccdc46<sup>RR</sup>* locus

medaka chr1: 4,649,989 - 4,651,610 (1622 bp)

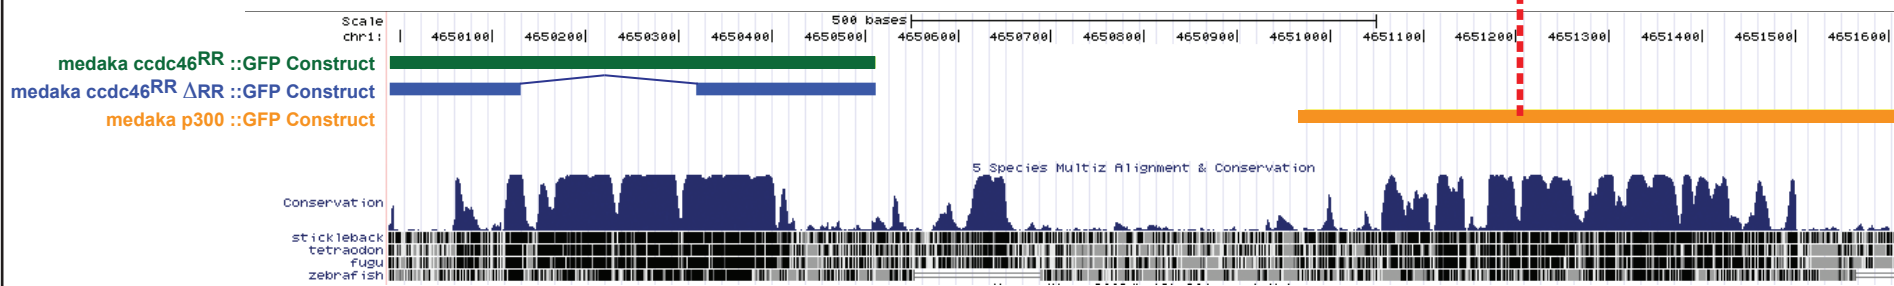

Genome Coordinates  
*Oryzias latipes*:  
 (NIG/UT MEDAKA1/oryLat2)  
*Mus musculus*:  
 (NCBI37/mm9)

Conservation tracks:  
 UCSC Genome Browser  
 (<http://genome.ucsc.edu/>)
