# Supplementary material for: De Novo Genesis of Enhancers in Vertebrates
Source: PubMed Central journal article supplement (PMC3206014; doi:10.1371/journal.pbio.1001188), 2011-11-01
Supplement: pbio.1001188.s010.pdf [file pbio.1001188.s010.pdf]

**Table S1** Eichenlaub and Ettwiller 2011

| Candidate RR Region                     | " <b>ttc29<sup>RR</sup></b> " | " <b>dock9<sup>RR</sup></b> " | " <b>ccdc46<sup>RR</sup></b> " | " <b>fam44b<sup>RR</sup></b> " |
|-----------------------------------------|-------------------------------|-------------------------------|--------------------------------|--------------------------------|
| <b>Human Gene ENSEMBL ID</b>            | ENSG00000137473 (TTC29)       | ENSG00000088387 (DOCK9)       | ENSG00000154240 (CCDC46)       | ENSG00000145919 (FAM44B)       |
| <b>Human exon location (GRCh37)</b>     | chr4:147830178-147830401:-1   | chr13:99738477-99738660:-1    | chr17:63898270-63898452:-1     | chr5:173036241-173036437:-1    |
| <b>Human exon length</b>                | 224 bp                        | 184 bp                        | 183 bp                         | 197 bp                         |
| <b>Stickleback BLASTZ hit (BROADS1)</b> | groupIX:6710625-6710804:1     | groupXVI:2860453-2860626:-1   | groupIX:12578736-12578860:1    | groupIV:13966044-13966125:-1   |
| <b>Stickleback BLASTZ hit length</b>    | 180 bp                        | 174 bp                        | 125 bp                         | 82 bp                          |
| <b>% ID to hs exon (BLASTZ hit)</b>     | 70%                           | 66%                           | 72%                            | 73%                            |
| <b>Medaka RR (MEDAKA1)</b>              | chr1:22443500-22443723:-1     | chr21:9260151-9260338:1       | chr1:4650130-4650315:-1        | chr10:16717951-16718149:-1     |
| <b>Medaka RR length</b>                 | 224 bp                        | 188 bp                        | 186 bp                         | 199 bp                         |
| <b>% ID to hs exon (Medaka RR)</b>      | 68%                           | 69%                           | 68%                            | 60%                            |
