# Supplementary material for: De Novo Genesis of Enhancers in Vertebrates
Source: PubMed Central journal article supplement (PMC3206014; doi:10.1371/journal.pbio.1001188), 2011-11-01
Supplement: pbio.1001188.s011.pdf [file pbio.1001188.s011.pdf]

**Table S2** Eichenlaub and Ettwiller 2011

| <b>Candidate RR Region</b> | <b>Human Gene ENSEMBL ID (EntrezGene ID)</b>   | <b>Human genes in synteny with stickleback</b>                                                | <b>Ciona EST IDs</b>                                         |
|----------------------------|------------------------------------------------|-----------------------------------------------------------------------------------------------|--------------------------------------------------------------|
| <b>ttc29<sup>RR</sup></b>  | <b>TTC29<br/>ENSG00000137473<br/>(83894)</b>   | <b>POU4F2, EDNRA, TMEM34, PRMT10,<br/>ARHGAP10, LSM6, NR3C2, ZNF827<br/>MMAA, SMAD1, HHIP</b> | <b>BW280658.1,<br/>BW416608,<br/>BP024045<br/>(GeneBank)</b> |
| <b>dock9<sup>RR</sup></b>  | <b>DOCK9<br/>ENSG00000088387<br/>(23348)</b>   | <b>ZIC2, ZIC5, CLYBL, EBI2, GPR18,<br/>GPR183, TMTC4, NALCN</b>                               | <b>---</b>                                                   |
| <b>ccdc46<sup>RR</sup></b> | <b>CCDC46<br/>ENSG00000154240<br/>(201134)</b> | <b>AXIN2, KPNA2, NOL11, APOH,<br/>PRKCA, CACNG5, CACNG4, HELZ,<br/>PSMD12, PITPNC1</b>        | <b>rcijv407d10,<br/>rcibd051c09<br/>(Ghost Database)</b>     |
| <b>fam44b<sup>RR</sup></b> | <b>FAM44B<br/>ENSG00000145919<br/>(91272)</b>  | <b>BNIP1, ATP6V0E1, RPL26L1, STC2,<br/>CPEB4, MSX2, DRD1</b>                                  | <b>---</b>                                                   |
