# Supplementary material for: De Novo Genesis of Enhancers in Vertebrates
Source: PubMed Central journal article supplement (PMC3206014; doi:10.1371/journal.pbio.1001188), 2011-11-01
Supplement: pbio.1001188.s012.pdf [file pbio.1001188.s012.pdf]

| Construct                                                            | Injected Embryos | Lens Expression (pos. Integration) | Specific Expression Pattern | % of Specific Expression      | Genomic Coordinates of Construct                        | Species (Assembly)            |
|----------------------------------------------------------------------|------------------|------------------------------------|-----------------------------|-------------------------------|---------------------------------------------------------|-------------------------------|
| Medaka <i>ttc29</i> <sup>RR</sup> ::GFP                              | 117              | 40                                 | 27                          | 67.50%                        | chr1:22443321-22443901                                  | Medaka (MEDAKA1)              |
| Medaka <i>ttc29</i> <sup>RR</sup> Δ RR ::GFP                         | 75               | 17                                 | 0                           | 0.00%                         | chr1:22443321-22443496,<br>chr1:22443727-22443901       | Medaka (MEDAKA1)              |
| Mouse <i>Ttc29</i> <sup>exon</sup> ::GFP (coding ortholog)           | 91               | 34                                 | 0                           | 0.00%                         | chr8:80769798-80770621                                  | Mouse (NCBI m37)              |
| Medaka <i>dock9</i> <sup>RR</sup> ::GFP                              | 94               | 33                                 | 17                          | 51.52%                        | chr21:9259960-9260528                                   | Medaka (MEDAKA1)              |
| Medaka <i>dock9</i> <sup>RR</sup> Δ RR ::GFP                         | 88               | 26                                 | 0                           | 0.00%                         | chr21:9259960-9260150,<br>chr21:9260339-9260528         | Medaka (MEDAKA1)              |
| Medaka <i>dock9</i> <sup>exon</sup> ::GFP (coding paralog 1of2)      | 60               | 15                                 | 0                           | 0.00%                         | chr21:25113257-25113767                                 | Medaka (MEDAKA1)              |
| Medaka <i>dock9</i> <sup>exon</sup> ::GFP (coding paralog 2of2)      | 78               | 24                                 | 0                           | 0.00%                         | chr2:21810012-21810516                                  | Medaka (MEDAKA1)              |
| Mouse <i>Dock9</i> <sup>exon</sup> ::GFP (coding ortholog)           | 77               | 21                                 | 0                           | 0.00%                         | chr14:122196512-122196833                               | Mouse (NCBI m37)              |
| Elephant Shark <i>dock9</i> <sup>exon</sup> ::GFP (coding ortholog)  | 63               | 33                                 | 0                           | 0.00%                         | contig AAVX01189524.1:<br>83-300                        | Elephant Shark (AAVX01000000) |
| Medaka <i>ccdc46</i> <sup>RR</sup> ::GFP                             | 78               | 26                                 | 16                          | 61.54%                        | chr1:4649989-4650511                                    | Medaka (MEDAKA1)              |
| Medaka <i>ccdc46</i> <sup>RR</sup> Δ RR ::GFP                        | 160              | 38                                 | 25                          | 65.79%<br>(residual activity) | chr1:4649989-4650130,<br>chr1:4650318-4650511           | Medaka (MEDAKA1)              |
| Medaka <i>ccdc46</i> <sup>exon</sup> ::GFP (coding paralog)          | 78               | 47                                 | 0                           | 0.00%                         | chr8:12224568-12225059                                  | Medaka (MEDAKA1)              |
| Mouse <i>Ccdc46</i> <sup>exon</sup> ::GFP (coding ortholog)          | 84               | 31                                 | 0                           | 0.00%                         | chr11:108467327-108467909                               | Mouse (NCBI m37)              |
| Elephant Shark <i>ccdc46</i> <sup>exon</sup> ::GFP (coding ortholog) | 111              | 24                                 | 0                           | 0.00%                         | contig AAVX01033398.1:<br>1414-1971                     | Elephant Shark (AAVX01000000) |
| Medaka <i>p300</i> ::GFP                                             | 68               | 24                                 | 22                          | 91.67%                        | chr1:4650972-4651610                                    | Medaka (MEDAKA1)              |
| Mouse <i>p300</i> + exon ::GFP                                       | 82               | 17                                 | 14                          | 82.35%                        | chr11:108466377-108467909                               | Mouse (NCBI m37)              |
| Mouse <i>p300</i> Δ exon ::GFP                                       | 98               | 28                                 | 22                          | 78.57%                        | chr11:108466377-108467526,<br>chr11:108467710-108467909 | Mouse (NCBI m37)              |
| Elephant Shark <i>p300</i> ::GFP                                     | 91               | 23                                 | 18                          | 78.26%                        | contig AAVX01033398.1:<br>1-1606                        | Elephant Shark (AAVX01000000) |
| Medaka <i>fam44b</i> <sup>RR</sup> ::GFP                             | 92               | 35                                 | 20                          | 57.14%                        | chr10:16717848-16718337                                 | Medaka (MEDAKA1)              |
| Medaka <i>fam44b</i> <sup>RR</sup> Δ RR ::GFP                        | 136              | 28                                 | 15                          | 53.57%                        | chr10:16717848-16717950,<br>chr10:16718150-16718337     | Medaka (MEDAKA1)              |

 = enhancer activity overlapping with expression domain of a flanking gene
